# Supplementary material for: Genetic variability and structure of an important wild steppe grass Psathyrostachys juncea (Triticeae: Poaceae) germplasm collection from north and central Asia
Source: PeerJ journal article supplement (doi:10.7717/peerj.9033), 2020-04-21
Supplement: Table_S2.docx [file Table_S2.docx]

**Table S2** Primer sequence information.

| **Adaptors and primers** | **sequence (5'-3')** | **primers** | **sequence** |
| --- | --- | --- | --- |
| EcoR I+1 | CTCGTAGACTGCGTACC | E59 | GACTGCGTACCAATTCCA |
| EcoR I+3 | AATTGGTACGCAGTCTAC | E84 | GACTGCGTACCAATTCTCC |
| Mse I +1 | GACGATGAGTCCTGAG | M49 | GATGAGTCCTGAGTAACAG |
| Mse I +3 | TACTCAGGACTCAT | M56 | GATGAGTCCTGAGTAACGC |
| E32 | GACTGCGTACCAATTCAC | M58 | GATGAGTCCTGAGTAACGT |
| E33 | GACTGCGTACCAATTCAG | M62 | GATGAGTCCTGAGTAACTT |
| E40 | GACTGCGTACCAATTCAC | M64 | GATGAGTCCTGAGTAAGAC |
| E50 | GACTGCGTACCAATTCCT |  |  |
