# Supplementary material for: Genetic variability and structure of an important wild steppe grass Psathyrostachys juncea (Triticeae: Poaceae) germplasm collection from north and central Asia
Source: PeerJ journal article supplement (doi:10.7717/peerj.9033), 2020-04-21
Supplement: Table_S3.docx [file Table_S3.docx]

**Table S3.** Nei’s genetic distance (above the diagonal) among eleven *P. juncea* populations based on Nei-Li diversity index.

|  | **PJ03** | **PJ04** | **PJ05** | **PJ08** | **PJ19** | **PJ20** | **PJ22** | **PJ23** | **PJ26** | **PJ27** | **PJ28** |
| --- | --- | --- | --- | --- | --- | --- | --- | --- | --- | --- | --- |
| PJ03 | - | 0.085 | 0.097 | 0.106 | 0.127 | 0.122 | 0.157 | 0.127 | 0.113 | 0.112 | 0.097 |
| PJ04 | 0.043 | - | 0.074 | 0.091 | 0.128 | 0.111 | 0.142 | 0.129 | 0.106 | 0.102 | 0.092 |
| PJ05 | 0.061 | 0.032 | - | 0.093 | 0.134 | 0.120 | 0.151 | 0.125 | 0.108 | 0.093 | 0.107 |
| PJ08 | 0.049 | 0.056 | 0.046 | - | 0.143 | 0.132 | 0.172 | 0.121 | 0.101 | 0.104 | 0.084 |
| PJ19 | 0.139 | 0.146 | 0.166 | 0.144 | - | 0.091 | 0.134 | 0.133 | 0.131 | 0.144 | 0.135 |
| PJ20 | 0.159 | 0.139 | 0.158 | 0.147 | 0.128 | - | 0.135 | 0.109 | 0.134 | 0.129 | 0.131 |
| PJ22 | 0.095 | 0.091 | 0.112 | 0.096 | 0.087 | 0.135 | - | 0.193 | 0.159 | 0.169 | 0.151 |
| PJ23 | 0.074 | 0.078 | 0.077 | 0.037 | 0.115 | 0.094 | 0.104 | - | 0.120 | 0.126 | 0.131 |
| PJ26 | 0.097 | 0.094 | 0.103 | 0.069 | 0.163 | 0.187 | 0.117 | 0.087 | - | 0.073 | 0.073 |
| PJ27 | 0.114 | 0.115 | 0.099 | 0.088 | 0.194 | 0.191 | 0.146 | 0.113 | 0.067 | - | 0.089 |
| PJ28 | 0.078 | 0.078 | 0.100 | 0.049 | 0.149 | 0.180 | 0.102 | 0.078 | 0.035 | 0.074 | - |
