# Supplementary material for: Genetic variability and structure of an important wild steppe grass Psathyrostachys juncea (Triticeae: Poaceae) germplasm collection from north and central Asia
Source: PeerJ journal article supplement (doi:10.7717/peerj.9033), 2020-04-21
Supplement: Table_S4.docx [file Table_S4.docx]

**Table S4.** Nei’s genetic distance (above the diagonal) among XJ, KZ and MGL groups of *P. juncea.*

|  | **XJ** | **KZ** | **MGL** |
| --- | --- | --- | --- |
| XJ | - | 0.098 | 0.074 |
| KZ | 0.048 | - | 0.136 |
| MGL | 0.040 | 0.060 | - |
