# Supplementary material for: Genetic variability and structure of an important wild steppe grass Psathyrostachys juncea (Triticeae: Poaceae) germplasm collection from north and central Asia
Source: PeerJ journal article supplement (doi:10.7717/peerj.9033), 2020-04-21
Supplement: Table_S5.docx [file Table_S5.docx]

**Table S5** Number of individuals correctly allocated to their source populations.

| **source population** | **N** | **Assigned population** | | | | | | | | | | | | **CA (%)** | **MA (%)** |
| --- | --- | --- | --- | --- | --- | --- | --- | --- | --- | --- | --- | --- | --- | --- | --- |
| **PJ03** | **PJ04** | **PJ05** | **PJ08** | **PJ19** | **PJ20** | **PJ22** | **PJ23** | **PJ26** | **PJ27** | **PJ28** | **None** |
| PJ03 | 7 | 2 |  |  |  |  |  |  |  |  |  |  | 5 | 28.57 | 71.43 |
| PJ04 | 8 |  | 4 | 1 |  |  |  |  |  |  |  |  | 3 | 50.00 | 50.00 |
| PJ05 | 7 |  | 3 | 4 |  |  |  |  |  |  |  |  |  | 57.14 | 42.86 |
| PJ08 | 6 |  |  | 1 | 1 |  |  |  |  |  |  |  | 4 | 16.67 | 83.33 |
| PJ19 | 8 |  |  |  |  | 7 |  |  |  |  |  |  | 1 | 87.50 | 12.50 |
| PJ20 | 10 |  |  |  |  |  | 10 |  |  |  |  |  |  | 100.00 | 0.00 |
| PJ22 | 4 |  |  |  |  | 2 | 1 | 1 |  |  |  |  |  | 25.00 | 75.00 |
| PJ23 | 4 |  |  |  |  |  | 2 |  | — | 1 |  |  | 1 | 0.00 | 100.00 |
| PJ26 | 9 |  |  |  |  |  |  |  |  | 5 |  | 2 | 2 | 55.56 | 44.44 |
| PJ27 | 8 |  |  |  |  |  |  |  |  | 1 | 7 |  |  | 87.50 | 12.50 |
| PJ28 | 10 |  |  |  |  |  |  |  |  | 1 |  | 6 | 3 | 60.00 | 40.00 |
| Mean |  |  |  |  |  |  |  |  |  |  |  |  |  | 51.63 | 48.37 |
| Total | 81 |  |  |  |  |  |  |  |  |  |  |  |  | 58.02 | 41.98 |

Note: N, total number of individuals per population; CA, percentage of correct allocation; MA, percentage of mistake allocation.
